# Supplementary material
Source: publisher figshare collection journal article supplement (https://tandf.figshare.com/ndownloader/files/18025961)
Supplement: Supplementary file 1 [file 18025961]

# The Management of Hypovolaemic Shock in the Trauma Patient

If definitive care is not available in your facility make early contact with retrieval services

## Primary survey

Includes organising the trauma team, calling the surgeon and notifying the blood bank.  
Also consider early call to Retrieval Services (AMRS 'formerly MRU' 1800 650 004).

| Airway / C-spine                                                                                                                                      | Breathing                                                                                                               | Circulation                                                                                                                                                                                                                                                                                                                                | Disability                                                                                                                                                                                                                                                                               | Exposure / Environment                                                                            | Adjuncts                                                                                                                                                                                      |
|-------------------------------------------------------------------------------------------------------------------------------------------------------|-------------------------------------------------------------------------------------------------------------------------|--------------------------------------------------------------------------------------------------------------------------------------------------------------------------------------------------------------------------------------------------------------------------------------------------------------------------------------------|------------------------------------------------------------------------------------------------------------------------------------------------------------------------------------------------------------------------------------------------------------------------------------------|---------------------------------------------------------------------------------------------------|-----------------------------------------------------------------------------------------------------------------------------------------------------------------------------------------------|
| <ul style="list-style-type: none"> <li>Protect airway, secure if unstable.</li> <li>Airway adjunct as needed.</li> <li>Control of c-spine.</li> </ul> | <ul style="list-style-type: none"> <li>Definitive control of airway.</li> <li>Oxygen.</li> <li>Bag and mask.</li> </ul> | <ul style="list-style-type: none"> <li>Secure venous access x 2 large bore cannula.</li> <li>Bloods:                             <ul style="list-style-type: none"> <li>- x-match</li> <li>- FBC</li> <li>- EUC's</li> <li>- Creatinine</li> <li>- ABG's</li> <li>- Blood ETOH.</li> </ul> </li> <li>Control external bleeding.</li> </ul> | <ul style="list-style-type: none"> <li>Assess neurological status.</li> <li>AVPU:                             <ul style="list-style-type: none"> <li>- alert</li> <li>- responds to vocal stimuli</li> <li>- responds to painful stimuli</li> <li>- unresponsive.</li> </ul> </li> </ul> | <ul style="list-style-type: none"> <li>Undress patient.</li> <li>Maintain temperature.</li> </ul> | <ul style="list-style-type: none"> <li>X-ray:                             <ul style="list-style-type: none"> <li>- chest</li> <li>- pelvis</li> <li>- lateral c-spine.</li> </ul> </li> </ul> |

**REMEMBER** – BP and HR will not identify all trauma patients who are in shock.  
**ASSESS** – History and perfusion indices – ABG's, base deficit, lactate, Hb and HCT.

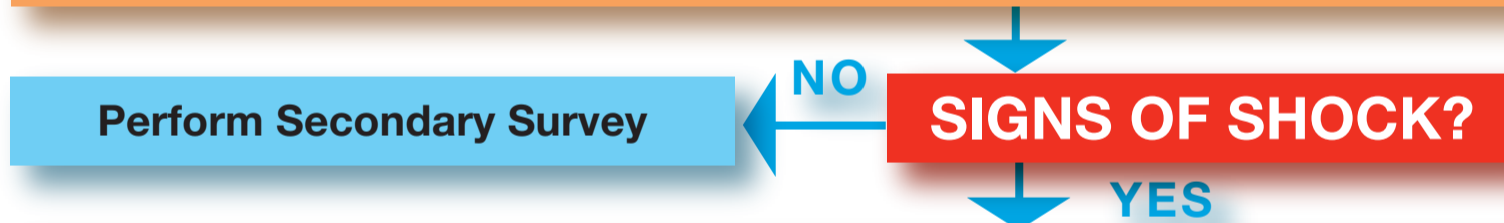

## Identify the source of haemorrhage

| External                                                                     | Long bones                                                                   | Chest                                                          | Abdomen                                                                 | Retroperitoneum                                                 |
|------------------------------------------------------------------------------|------------------------------------------------------------------------------|----------------------------------------------------------------|-------------------------------------------------------------------------|-----------------------------------------------------------------|
| <ul style="list-style-type: none"> <li>Careful visual inspection.</li> </ul> | <ul style="list-style-type: none"> <li>Careful visual inspection.</li> </ul> | <ul style="list-style-type: none"> <li>Chest x-ray.</li> </ul> | <ul style="list-style-type: none"> <li>DPA* and / or FAST**.</li> </ul> | <ul style="list-style-type: none"> <li>Pelvic x-ray.</li> </ul> |

\* Diagnostic Peritoneal Aspiration (DPA). >10mls of frank blood = positive DPA.  
\*\* Focused Abdominal Sonography in Trauma (FAST). Free fluid = positive FAST.

## Interventions

| External                                                                                              | Long bones                                                               | Chest                                                         | Abdomen                                                                 | Retroperitoneum                                                                                              |
|-------------------------------------------------------------------------------------------------------|--------------------------------------------------------------------------|---------------------------------------------------------------|-------------------------------------------------------------------------|--------------------------------------------------------------------------------------------------------------|
| <ul style="list-style-type: none"> <li>Apply direct pressure.</li> <li>Suture lacerations.</li> </ul> | <ul style="list-style-type: none"> <li>Splint + / - reduce #.</li> </ul> | <ul style="list-style-type: none"> <li>Chest tube.</li> </ul> | <ul style="list-style-type: none"> <li>Emergency Laparotomy.</li> </ul> | <ul style="list-style-type: none"> <li>Externally stabilise pelvis.</li> <li>Emergency angiogram.</li> </ul> |

In the presence of uncontrolled haemorrhage and a delay of greater than 30 minutes to operative haemostasis, infuse small aliquots (100-200mls) of fluid to maintain systolic blood pressure between 80-90mmHg. Use caution in the elderly. Contraindicated in the unconscious patient without a palpable blood pressure. Maintain the systolic blood pressure >90mmHg for those with a traumatic brain injury.
